# Supplementary material for: Poorly soluble drugs: disbalance of thermodynamic characteristics of crystal lattice and solvation
Source: Royal Society of Chemistry journal article supplement (doi:10.1039/c6ra14333d), 2016-01-01
Supplement: c6ra14333d1.pdf [file c6ra14333d1.pdf]

SUPPORTING INFORMATION FOR PUBLICATION

# **Poorly Soluble Drugs: Disbalance of Thermodynamic Characteristics of Crystal Lattice and Solvation**

*German L. Perlovich<sup>a,b</sup>*

*<sup>a</sup>Department of Physical Chemistry of Drugs, Krestov's Institute of Solution Chemistry,  
Russian Academy of Sciences, 153045, 1 Akademicheskaya St., Ivanovo, Russia;*

*<sup>b</sup>Department of Computer-Aided Molecular Design, Institute of Physiologically Active  
Compounds, Russian Academy of Sciences, 142432, Chernogolovka, Russia;*

*Corresponding author: Perlovich, G.L. ([glp@isc-ras.ru](mailto:glp@isc-ras.ru))*



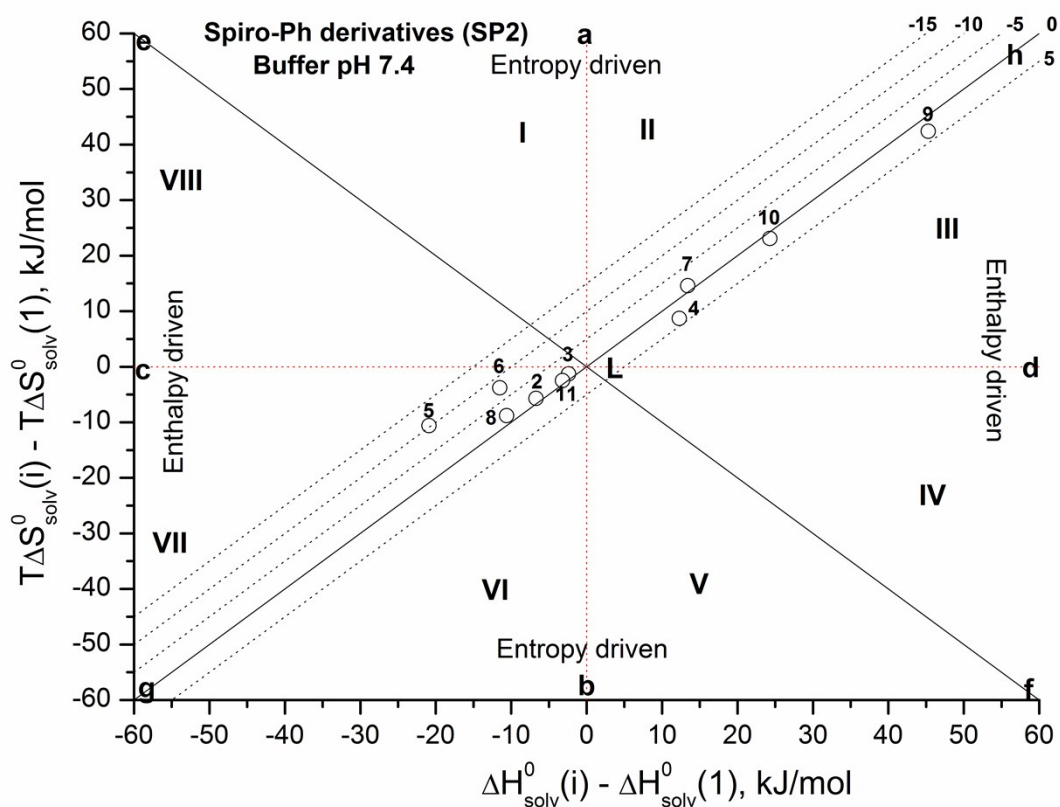

c

**Figure 1SI.** Diagrams for experimental data of sublimation, solvation and dissolution processes of the spiro derivatives type 2 (SP2) in comparison to the reference compound: a) experimental data in co-coordinates  $(\Delta G_{sub}^0(i) - \Delta G_{sub}^0(1))$  vs  $(\Delta G_{solv}^0(i) - \Delta G_{solv}^0(1))$ ; b) experimental data in co-coordinates  $(T\Delta S_{sub}^0(i) - T\Delta S_{sub}^0(1))$  vs  $(\Delta H_{sub}^0(i) - \Delta H_{sub}^0(1))$ ; c) experimental data in co-coordinates  $(T\Delta S_{solv}^0(i) - T\Delta S_{solv}^0(1))$  vs  $(\Delta H_{solv}^0(i) - \Delta H_{solv}^0(1))$ . Numbering corresponds to Figure 1.

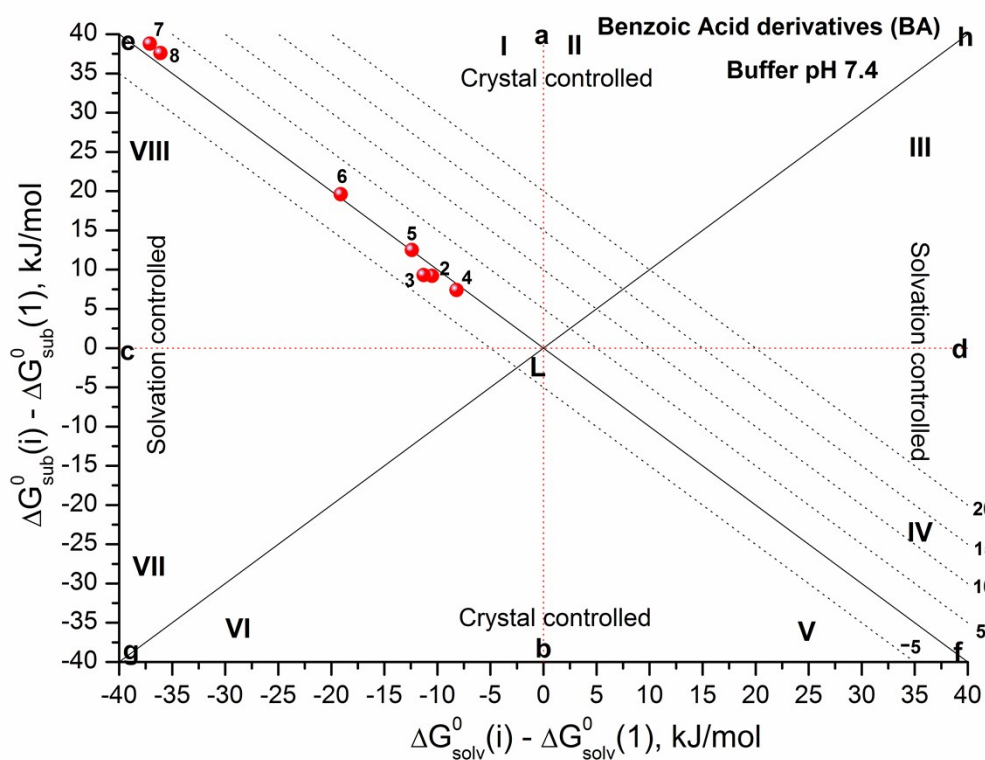

a

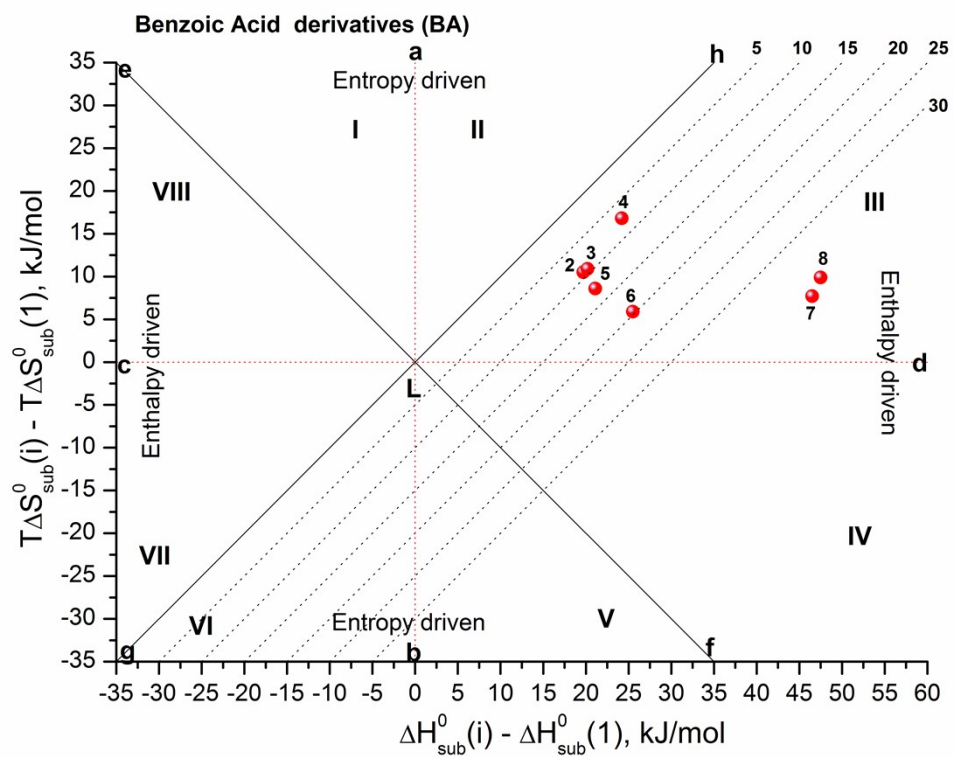

b

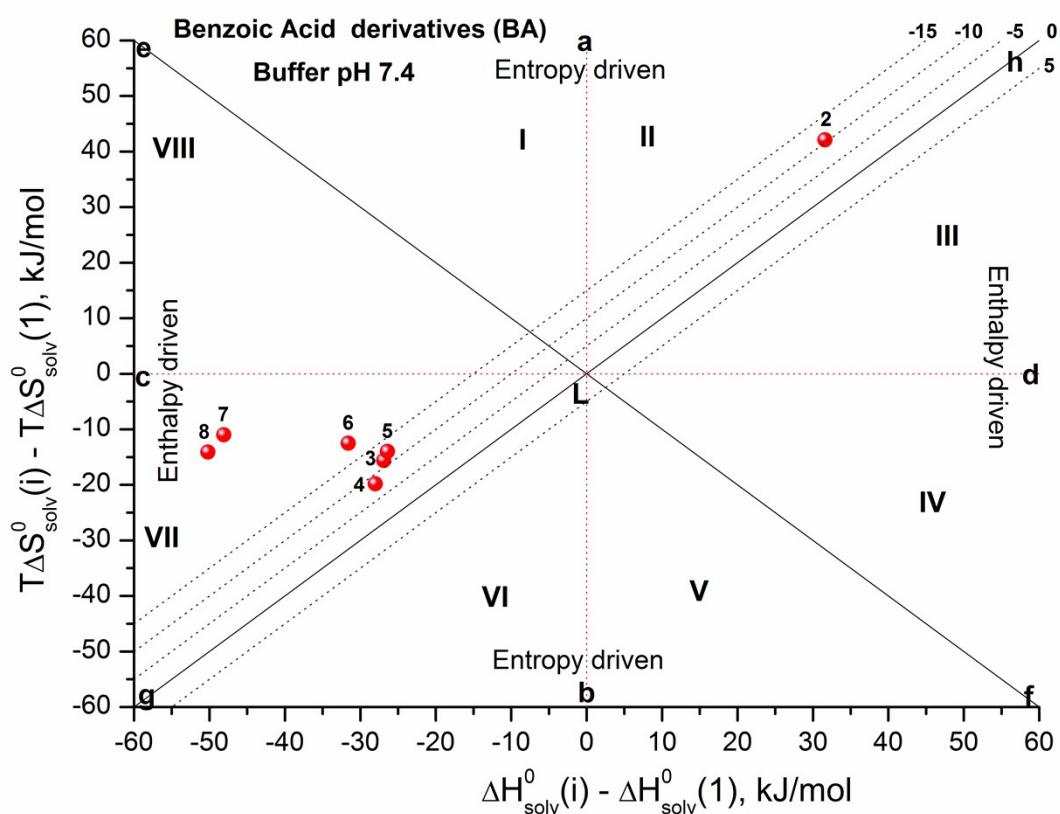

c

**Figure 2SI.** Diagrams for experimental data of sublimation, solvation and dissolution processes of the benzoic acid and their derivatives (BA) in comparison to the reference compound: a) experimental data in co-coordinates  $(\Delta G_{sub}^0(i) - \Delta G_{sub}^0(1))$  vs  $(\Delta G_{solv}^0(i) - \Delta G_{solv}^0(1))$ ; b) experimental data in co-coordinates  $(T\Delta S_{sub}^0(i) - T\Delta S_{sub}^0(1))$  vs  $(\Delta H_{sub}^0(i) - \Delta H_{sub}^0(1))$ ; c) experimental data in co-coordinates  $(T\Delta S_{solv}^0(i) - T\Delta S_{solv}^0(1))$  vs  $(\Delta H_{solv}^0(i) - \Delta H_{solv}^0(1))$ . Numbering corresponds to Figure 1.

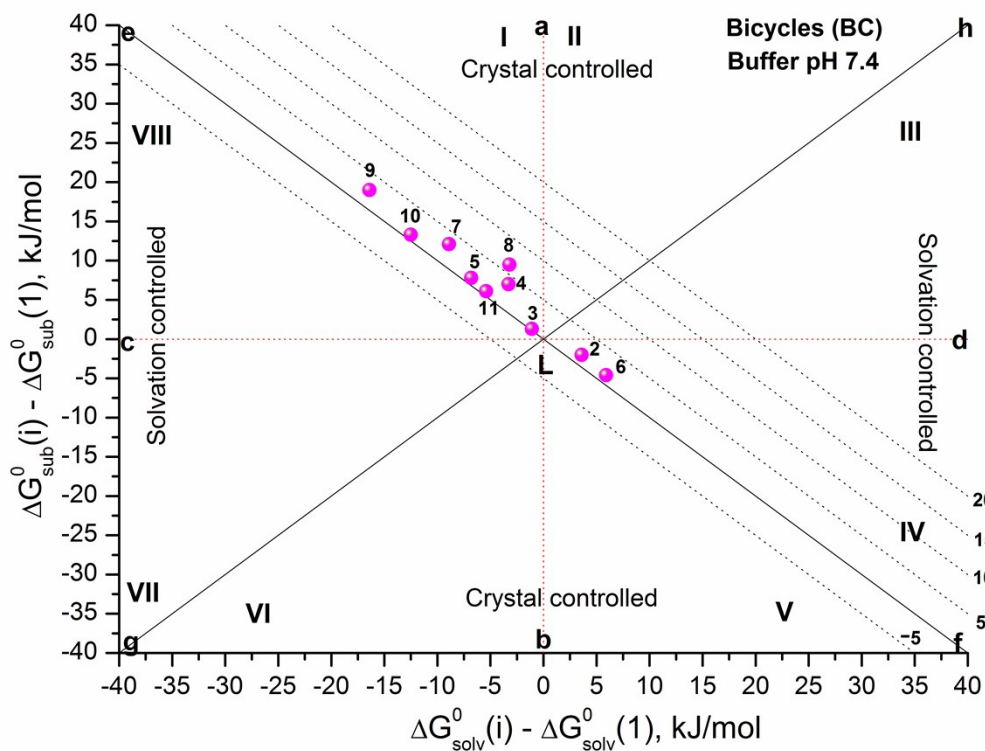

a

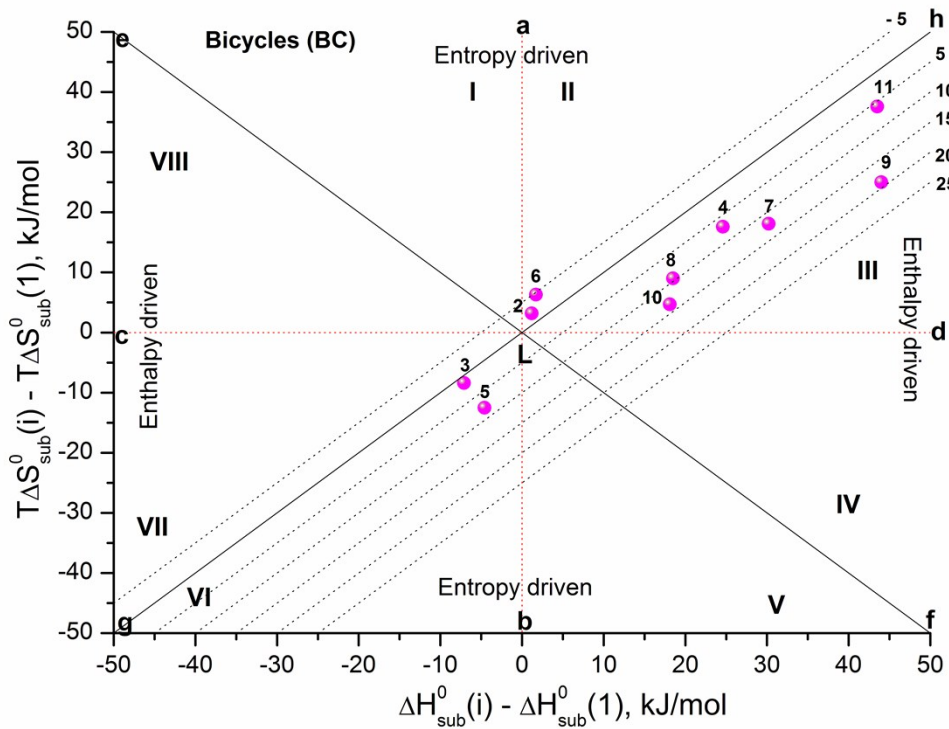

b

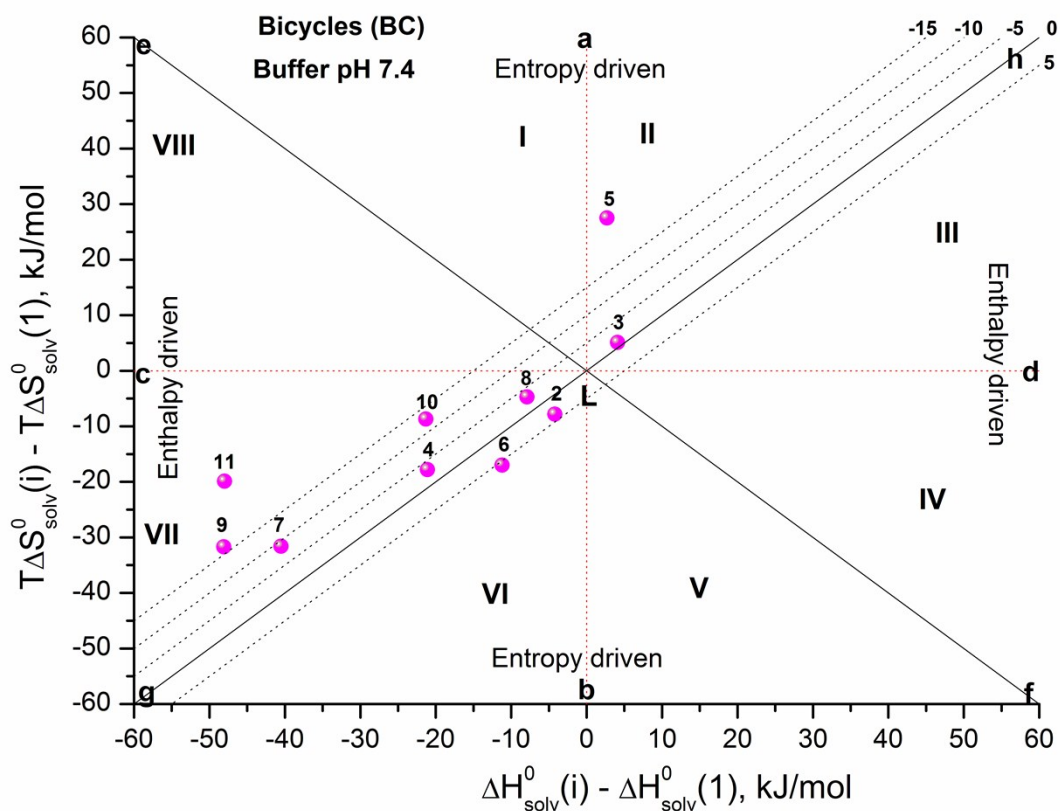

c

**Figure 3SI.** Diagrams for experimental data of sublimation, solvation and dissolution processes of the Bicycles (BC) in comparison to the reference compound: a) experimental data in co-coordinates  $(\Delta G_{sub}^0(i) - \Delta G_{sub}^0(1))$  vs  $(\Delta G_{solv}^0(i) - \Delta G_{solv}^0(1))$ ; b) experimental data in co-coordinates  $(T\Delta S_{sub}^0(i) - T\Delta S_{sub}^0(1))$  vs  $(\Delta H_{sub}^0(i) - \Delta H_{sub}^0(1))$ ; c) experimental data in co-coordinates  $(T\Delta S_{solv}^0(i) - T\Delta S_{solv}^0(1))$  vs  $(\Delta H_{solv}^0(i) - \Delta H_{solv}^0(1))$ . Numbering corresponds to Figure 1.



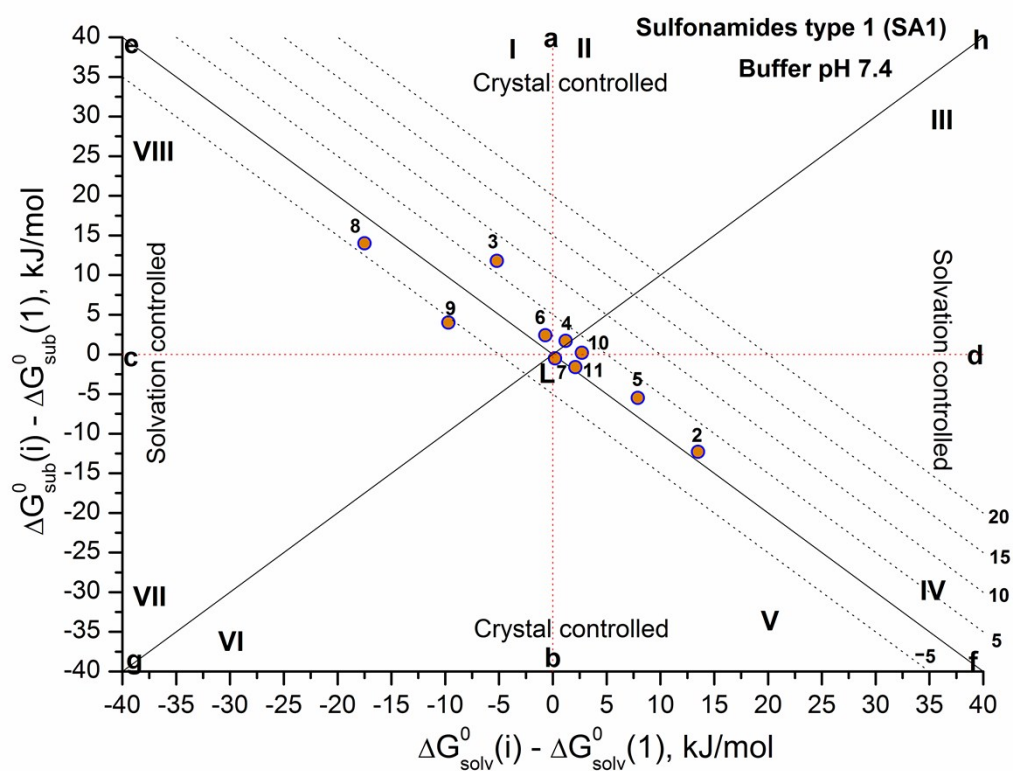

a

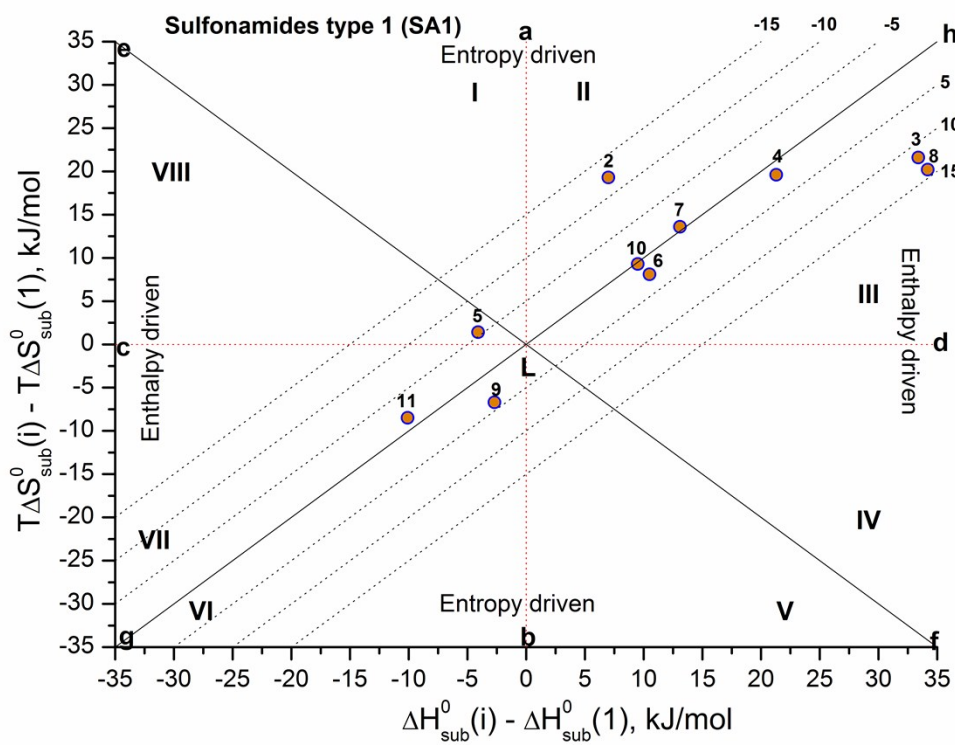

b



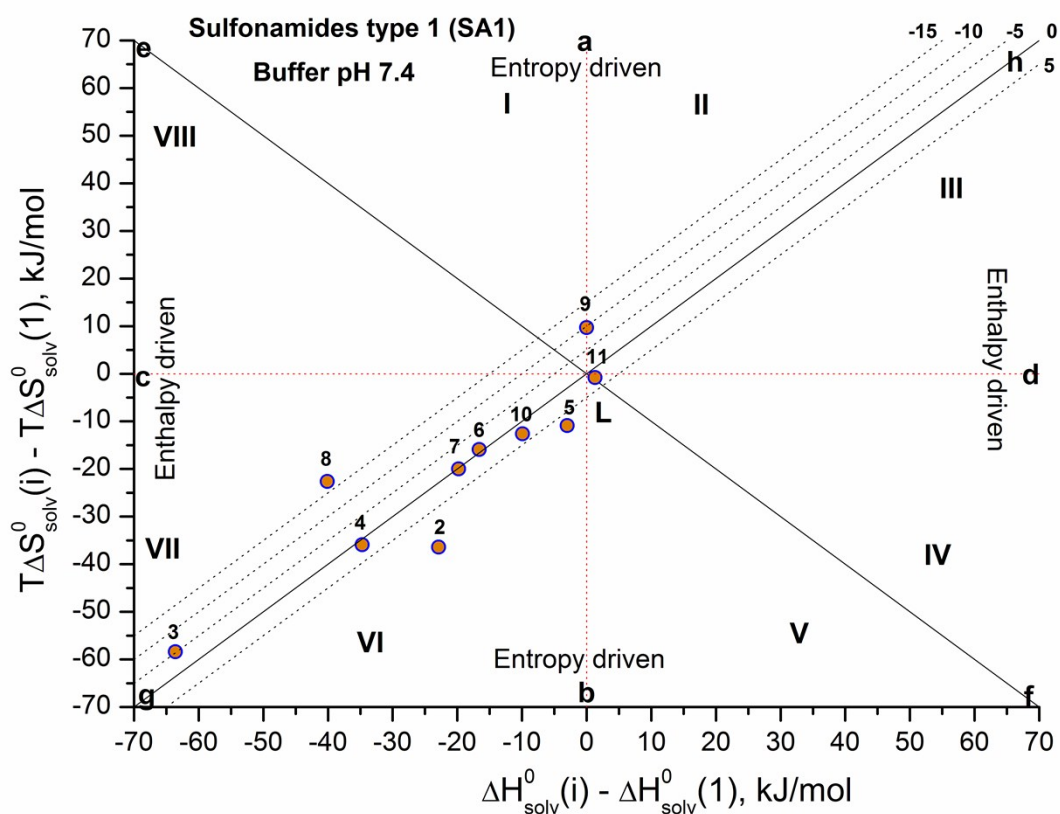

c

**Figure 4SI.** Diagrams for experimental data of sublimation, solvation and dissolution processes of the Sulfonamides type 1 (SA1) in comparison to the reference compound: a) experimental data in co-coordinates  $(\Delta G_{sub}^0(i) - \Delta G_{sub}^0(1))$  vs  $(\Delta G_{solv}^0(i) - \Delta G_{solv}^0(1))$ ; b) experimental data in co-coordinates  $(T\Delta S_{sub}^0(i) - T\Delta S_{sub}^0(1))$  vs  $(\Delta H_{sub}^0(i) - \Delta H_{sub}^0(1))$ ; c) experimental data in co-coordinates  $(T\Delta S_{solv}^0(i) - T\Delta S_{solv}^0(1))$  vs  $(\Delta H_{solv}^0(i) - \Delta H_{solv}^0(1))$ . Numbering corresponds to Figure 1.

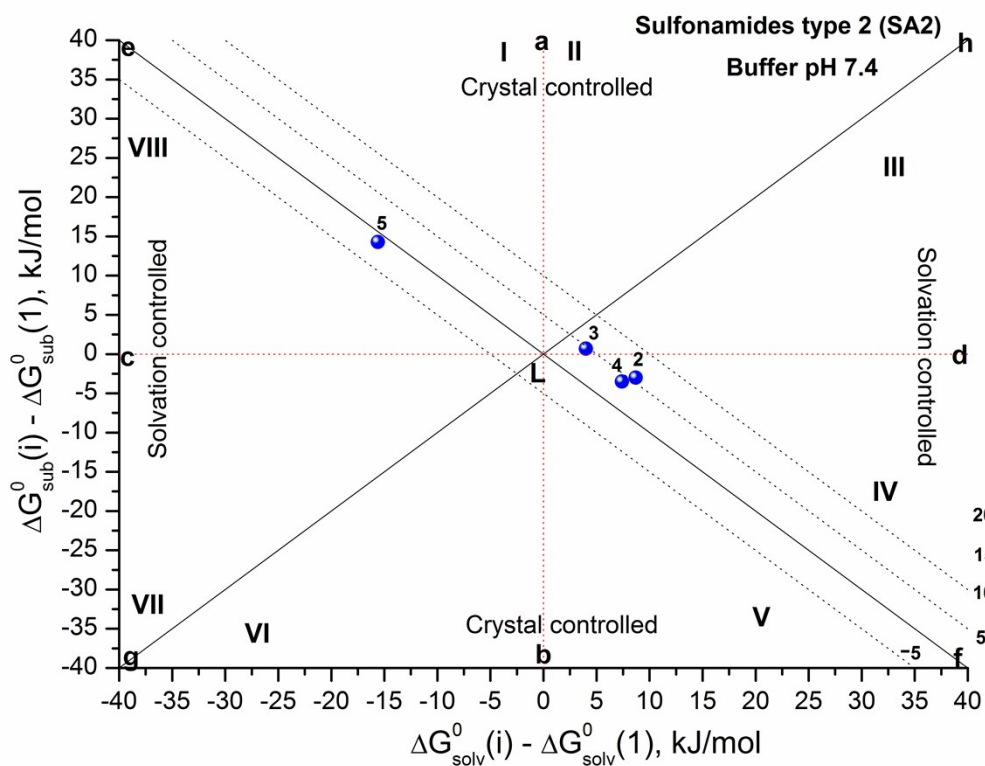

a

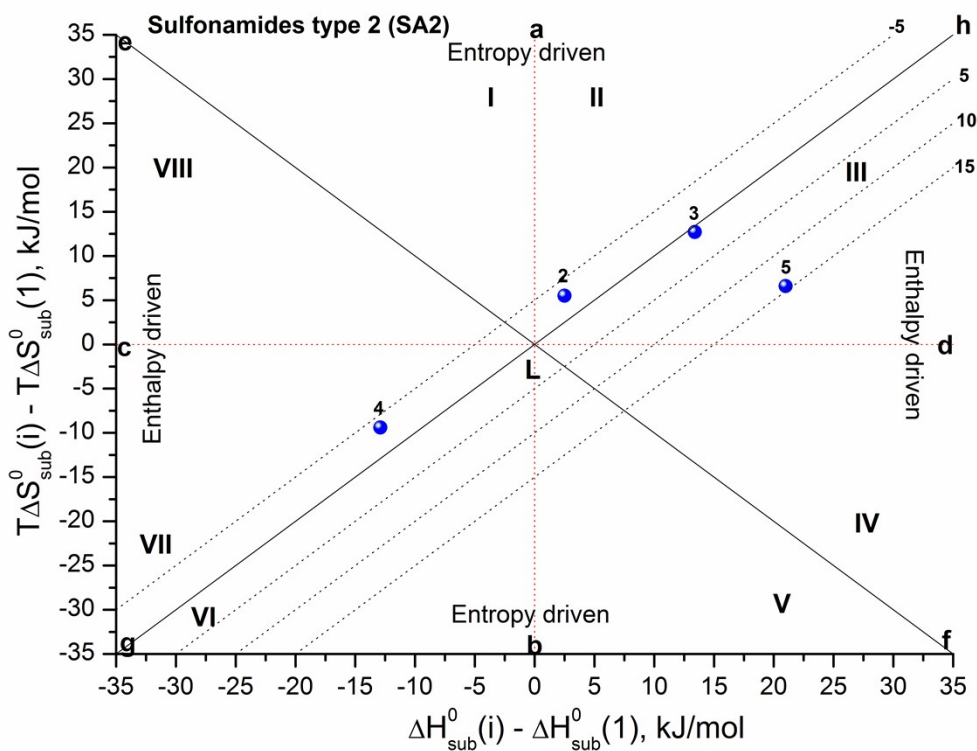

b

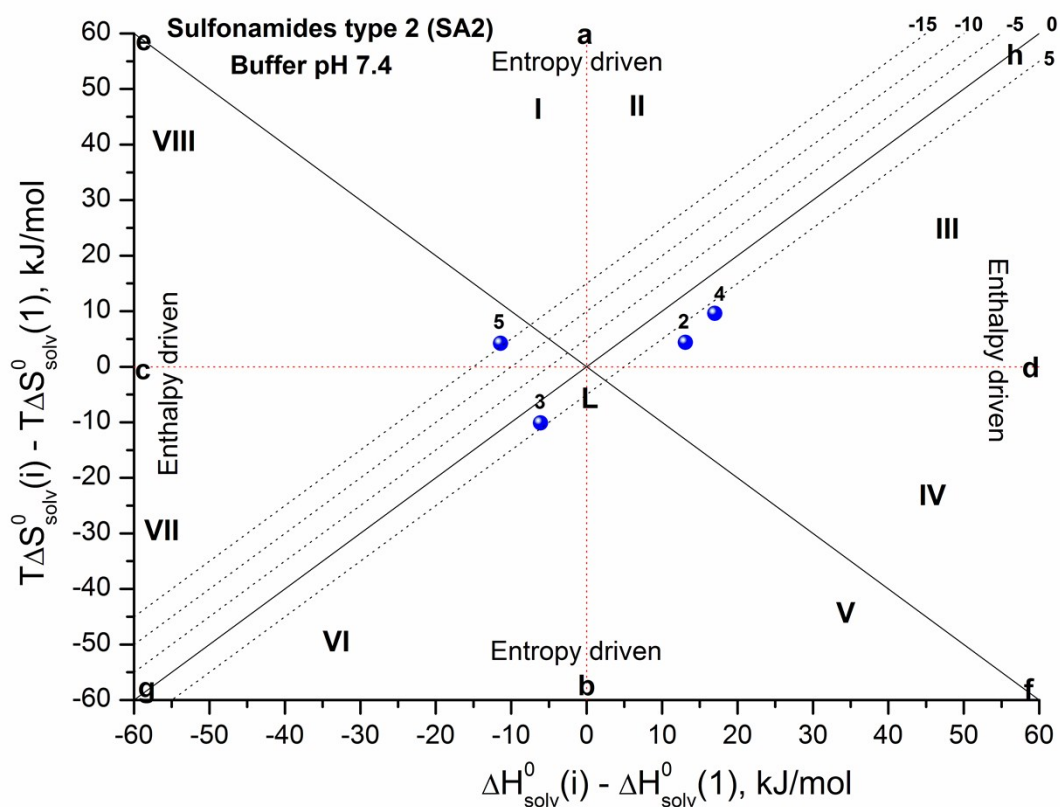

c

**Figure 5SI.** Diagrams for experimental data of sublimation, solvation and dissolution processes of the Sulfonamides type 2 (SA2) in comparison to the reference compound: a) experimental data in co-coordinates  $(\Delta G_{sub}^0(i) - \Delta G_{sub}^0(1))$  vs  $(\Delta G_{solv}^0(i) - \Delta G_{solv}^0(1))$ ; b) experimental data in co-coordinates  $(T\Delta S_{sub}^0(i) - T\Delta S_{sub}^0(1))$  vs  $(\Delta H_{sub}^0(i) - \Delta H_{sub}^0(1))$ ; c) experimental data in co-coordinates  $(T\Delta S_{solv}^0(i) - T\Delta S_{solv}^0(1))$  vs  $(\Delta H_{solv}^0(i) - \Delta H_{solv}^0(1))$ . Numbering corresponds to Figure 1.

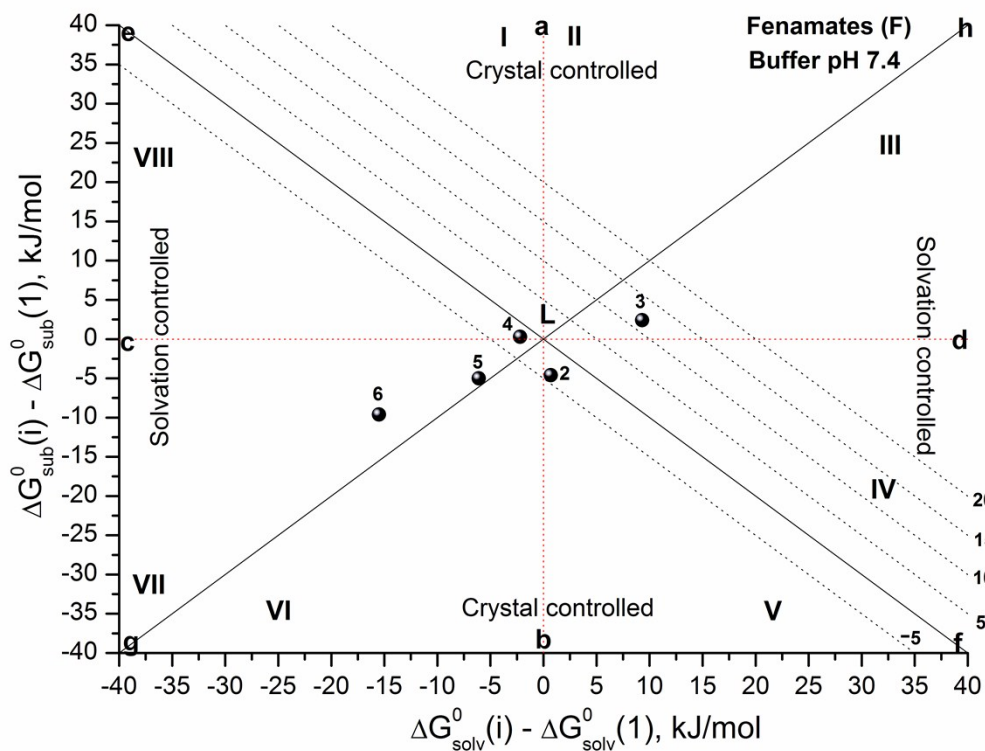

a

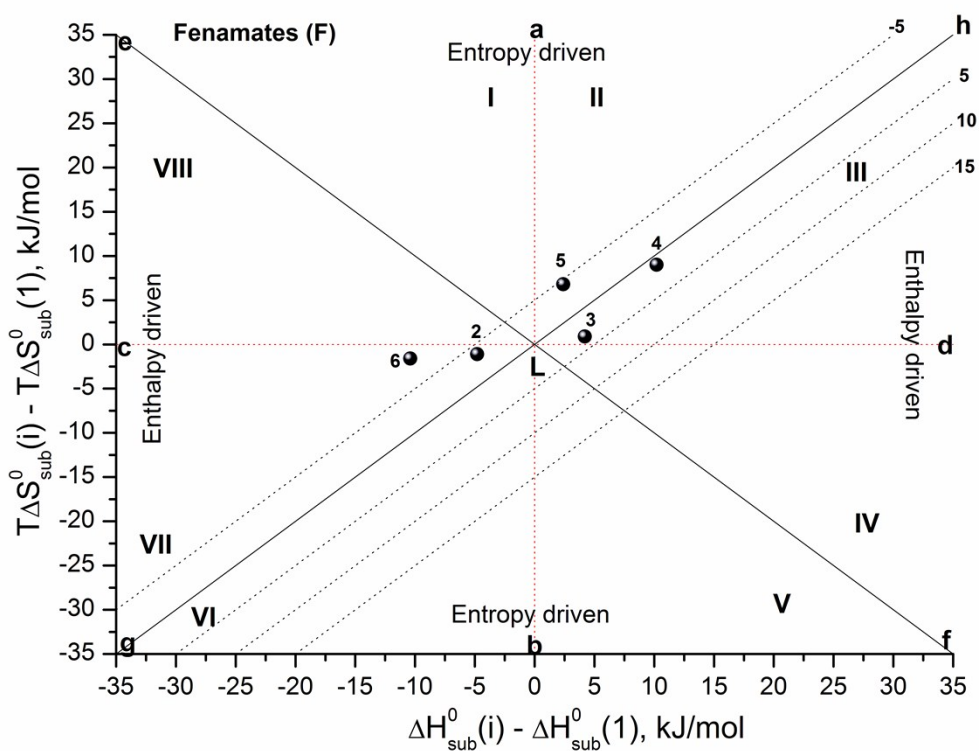

b

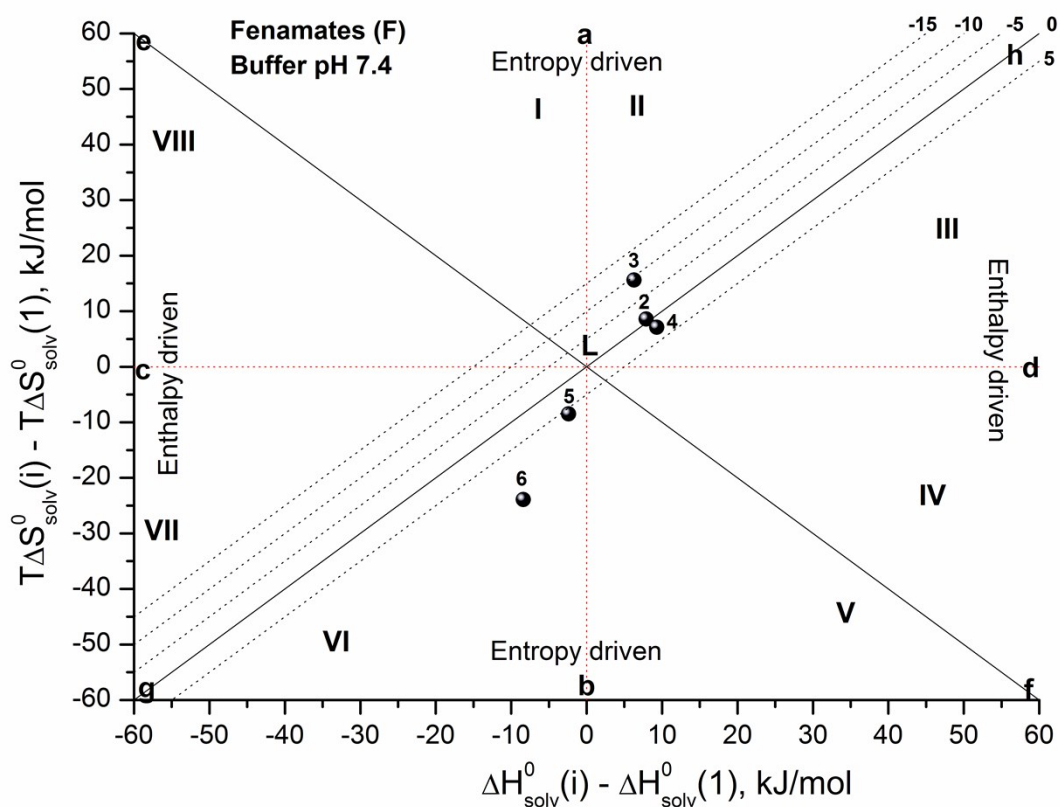

c

**Figure 6SI.** Diagrams for experimental data of sublimation, solvation and dissolution processes of the N-phenyl-anthranilic acid and their derivatives (fenamates) in comparison to the reference compound: a) experimental data in co-coordinates  $(\Delta G_{sub}^0(i) - \Delta G_{sub}^0(1))$  vs  $(\Delta G_{solv}^0(i) - \Delta G_{solv}^0(1))$ ; b) experimental data in co-coordinates  $(T\Delta S_{sub}^0(i) - T\Delta S_{sub}^0(1))$  vs  $(\Delta H_{sub}^0(i) - \Delta H_{sub}^0(1))$ ; c) experimental data in co-coordinates  $(T\Delta S_{solv}^0(i) - T\Delta S_{solv}^0(1))$  vs  $(\Delta H_{solv}^0(i) - \Delta H_{solv}^0(1))$ . Numbering corresponds to Figure 1.

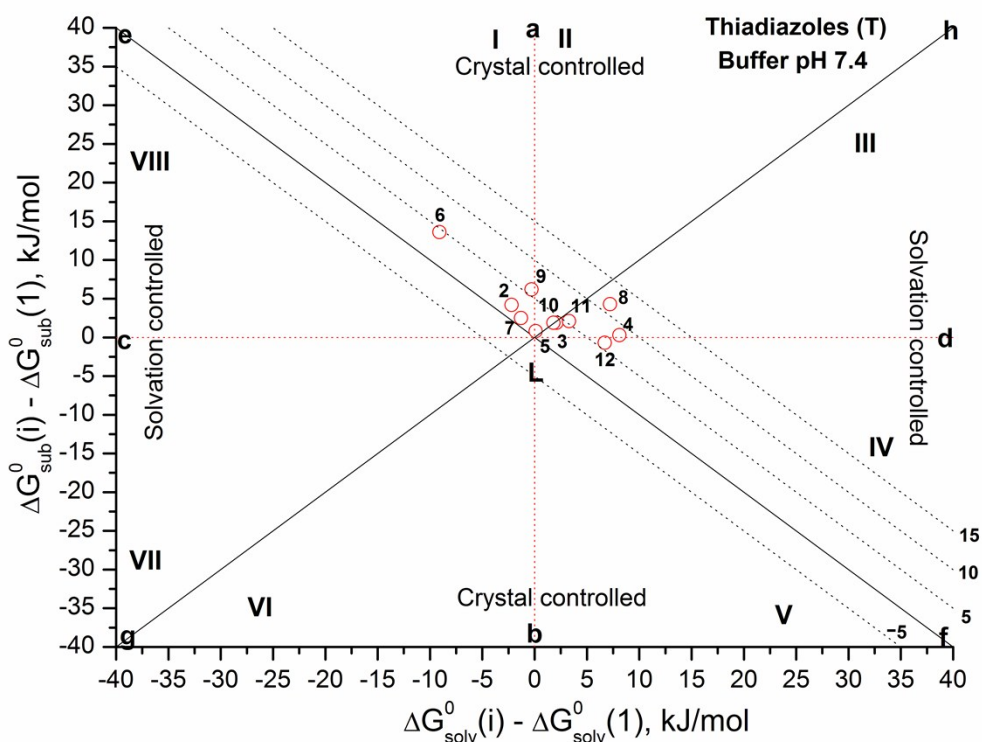

a

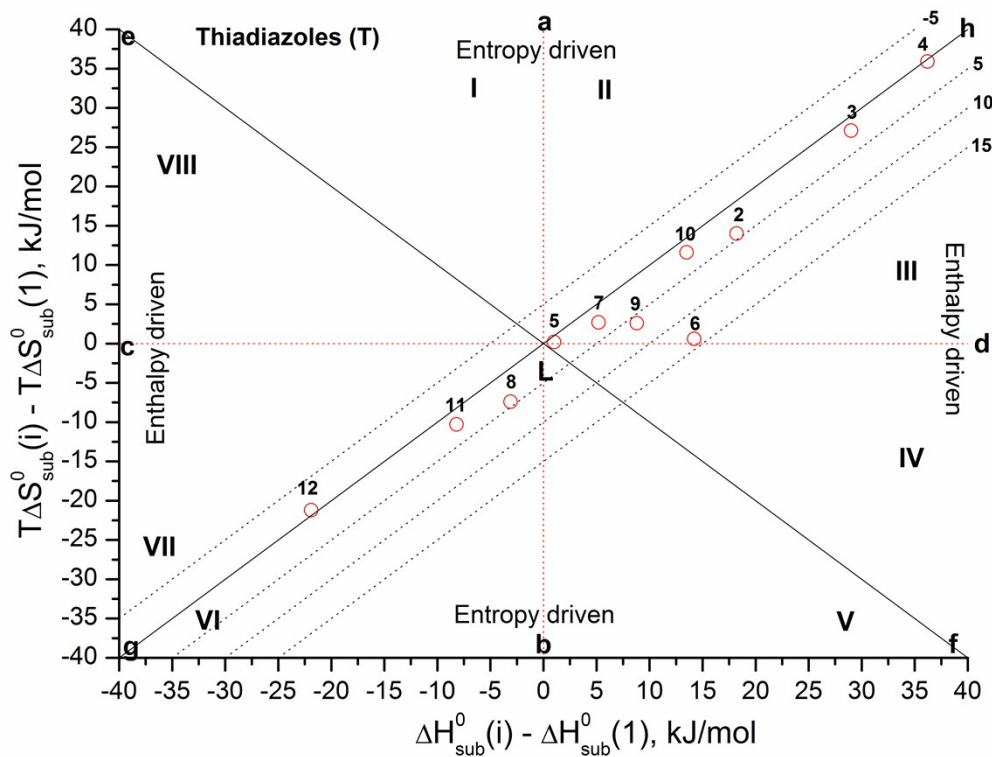

b

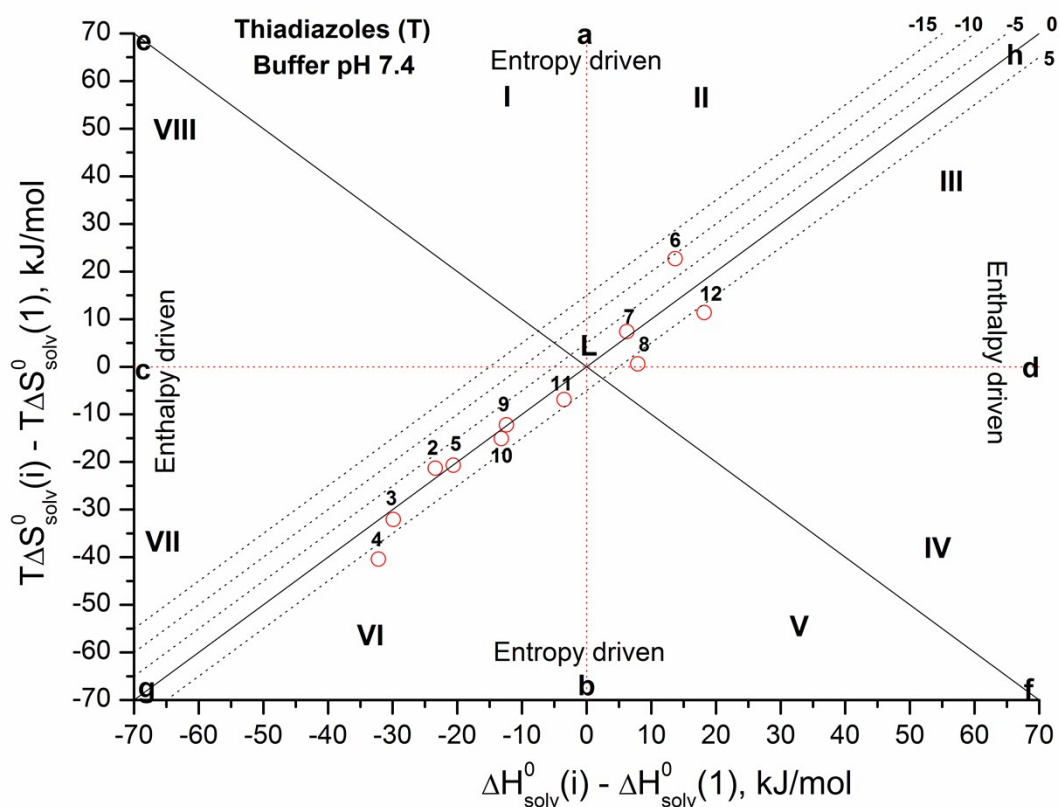

c

**Figure 7SI.** Diagrams for experimental data of sublimation, solvation and dissolution processes of the Thiadiazoles (T) in comparison to the reference compound: a) experimental data in co-coordinates  $(\Delta G_{sub}^0(i) - \Delta G_{sub}^0(1))$  vs  $(\Delta G_{solv}^0(i) - \Delta G_{solv}^0(1))$ ; b) experimental data in co-coordinates  $(T\Delta S_{sub}^0(i) - T\Delta S_{sub}^0(1))$  vs  $(\Delta H_{sub}^0(i) - \Delta H_{sub}^0(1))$ ; c) experimental data in co-coordinates  $(T\Delta S_{solv}^0(i) - T\Delta S_{solv}^0(1))$  vs  $(\Delta H_{solv}^0(i) - \Delta H_{solv}^0(1))$ . Numbering corresponds to Figure 1.



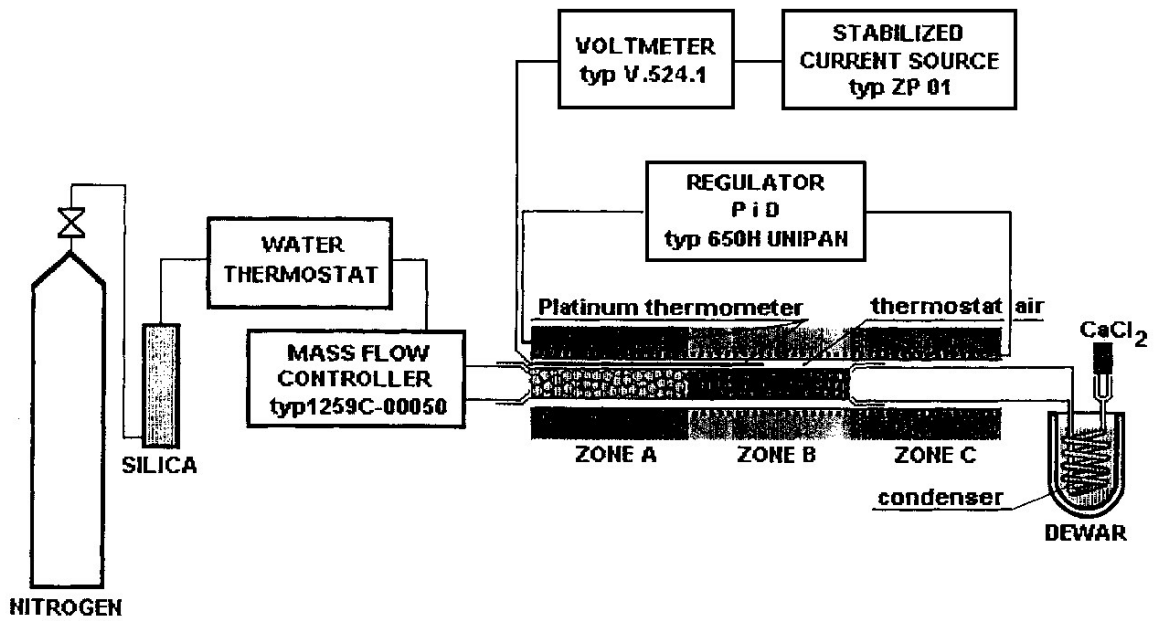

**Scheme 1SI.** The scheme of device based on the flow inert gas method

**Table 1S1**

Energies Gibbs of solubility processes ( $\Delta G_{sol}^0$  in kJ·mol<sup>-1</sup>) and solubility values ( $X_2^{298}$  in mol. fraction) of the compounds studied in buffer with pH 7.4 at 298 K; thermodynamic sublimation functions (Gibbs energies -  $\Delta G_{sub}^0$  in kJ·mol<sup>-1</sup>. enthalpies -  $\Delta H_{sub}^0$  in kJ·mol<sup>-1</sup> and entropy terms -  $T\Delta S_{sub}^0$  in kJ·mol<sup>-1</sup>) at 298 K; thermodynamic solvation/hydration functions in buffer with pH 7.4 (Gibbs energies -  $\Delta G_{solv}^0$  in kJ·mol<sup>-1</sup>. enthalpies -  $\Delta H_{solv}^0$  in kJ·mol<sup>-1</sup> and entropy terms -  $T\Delta S_{solv}^0$  in kJ·mol<sup>-1</sup>) at 298 K.

| Compound | $X_2^{298}$           | $\Delta G_{sol}^0$ | $\Delta G_{sub}^0$ | $\Delta H_{sub}^0$ | $T\Delta S_{sub}^0$ | $\Delta G_{solv}^0$ | $\Delta H_{solv}^0$ | $T\Delta S_{solv}^0$ |
|----------|-----------------------|--------------------|--------------------|--------------------|---------------------|---------------------|---------------------|----------------------|
| SP1-1    | 3.01·10 <sup>-4</sup> | 20.1               | 39.9               | 100.7              | 60.8                | -19.8               | -86.2               | -66.4                |
| SP1-2    | 1.71·10 <sup>-4</sup> | 21.5               | 38.4               | 95.1               | 56.7                | -16.9               | -83.7               | -66.6                |
| SP1-3    | 6.74·10 <sup>-4</sup> | 18.1               | 40.9               | 100.8              | 59.9                | -22.8               | -64.4               | -41.6                |
| SP2-1    | 7.35·10 <sup>-6</sup> | 29.3               | 56.8               | 125.9              | 69.1                | -27.5               | -123.3              | -95.8                |
| SP2-2    | 2.47·10 <sup>-6</sup> | 32.0               | 60.6               | 136.8              | 76.2                | -28.6               | -130.0              | -101.5               |
| SP2-3    | 1.59·10 <sup>-6</sup> | 33.1               | 61.7               | 138.3              | 76.6                | -28.6               | -125.7              | -97.1                |
| SP2-4    | 5.34·10 <sup>-7</sup> | 35.8               | 59.7               | 122.8              | 63.1                | -23.9               | -111.0              | -87.1                |
| SP2-5    | 1.20·10 <sup>-6</sup> | 33.8               | 71.6               | 156                | 84.4                | -37.8               | -144.2              | -106.4               |
| SP2-6    | 9.75·10 <sup>-6</sup> | 28.6               | 63.7               | 139.1              | 69                  | -35.1               | -134.8              | -99.6                |
| SP2-7    | 2.69·10 <sup>-7</sup> | 37.5               | 66.2               | 120.1              | 49.4                | -28.7               | -109.9              | -81.2                |
| SP2-8    | 1.20·10 <sup>-7</sup> | 39.5               | 68.9               | 141.6              | 72.6                | -29.4               | -133.9              | -104.6               |
| SP2-9    | 1.65·10 <sup>-6</sup> | 33.0               | 57.6               | 92                 | 31.4                | -24.6               | -78.0               | -53.4                |
| SP2-10   | 4.37·10 <sup>-7</sup> | 36.3               | 62.5               | 128.5              | 66                  | -26.2               | -99.0               | -72.7                |
| SP2-11   | 2.11·10 <sup>-7</sup> | 38.1               | 66.4               | 141.7              | 75.3                | -28.3               | -126.5              | -98.3                |
| BA-1     | 1.51·10 <sup>-3</sup> | 16.1               | 34.4               | 90.5               | 56.1                | -18.3               | -80.4               | -62.1                |
| BA-2     | 2.55·10 <sup>-3</sup> | 14.8               | 43.6               | 110.2              | 66.6                | -28.8               | -48.8               | -20.0                |
| BA-3     | 3.39·10 <sup>-3</sup> | 14.1               | 43.7               | 110.7              | 67.0                | -29.6               | -107.3              | -77.7                |
| BA-4     | 2.09·10 <sup>-3</sup> | 15.3               | 41.8               | 114.7              | 72.9                | -26.5               | -108.4              | -81.9                |
| BA-5     | 1.45·10 <sup>-3</sup> | 16.2               | 46.9               | 111.6              | 64.7                | -30.7               | -106.8              | -76.1                |
| BA-6     | 1.23·10 <sup>-3</sup> | 16.6               | 54.0               | 116.0              | 62.0                | -37.4               | -112.0              | -74.6                |
| BA-7     | 7.61·10 <sup>-4</sup> | 17.8               | 73.2               | 137.0              | 63.8                | -55.4               | -128.5              | -73.1                |
| BA-8     | 8.25·10 <sup>-4</sup> | 17.6               | 72.0               | 138.0              | 66.0                | -54.4               | -130.6              | -76.2                |

**Table 1SI (Continued)**

| Compound | $X_2^{298}$          | $\Delta G_{sol}^0$ | $\Delta G_{sub}^0$ | $\Delta H_{sub}^0$ | $T\Delta S_{sub}^0$ | $\Delta G_{solv}^0$ | $\Delta H_{solv}^0$ | $T\Delta S_{solv}^0$ |
|----------|----------------------|--------------------|--------------------|--------------------|---------------------|---------------------|---------------------|----------------------|
| BC-1     | $7.35 \cdot 10^{-6}$ | 29.3               | 48.6               | 106.5              | 57.9                | -19.3               | -83.3               | -64.0                |
| BC-2     | $3.86 \cdot 10^{-6}$ | 30.9               | 46.6               | 107.7              | 61.1                | -15.7               | -87.5               | -71.8                |
| BC-3     | $6.78 \cdot 10^{-6}$ | 29.5               | 49.9               | 99.4               | 49.5                | -20.4               | -79.2               | -58.9                |
| BC-4     | $1.65 \cdot 10^{-6}$ | 33.0               | 55.6               | 131.1              | 75.5                | -22.6               | -104.4              | -81.8                |
| BC-5     | $4.91 \cdot 10^{-6}$ | 30.3               | 56.4               | 101.9              | 45.4                | -26.1               | -80.6               | -36.5                |
| BC-6     | $4.35 \cdot 10^{-6}$ | 30.6               | 44.0               | 108.2              | 64.2                | -13.4               | -94.5               | -81.0                |
| BC-7     | $2.02 \cdot 10^{-6}$ | 32.5               | 60.7               | 136.7              | 76.0                | -28.2               | -123.8              | -95.6                |
| BC-8     | $5.79 \cdot 10^{-7}$ | 35.6               | 58.1               | 125.0              | 66.9                | -22.5               | -91.2               | -68.7                |
| BC-9     | $2.58 \cdot 10^{-6}$ | 31.9               | 67.6               | 150.5              | 82.9                | -35.7               | -131.4              | -95.7                |
| BC-10    | $4.02 \cdot 10^{-6}$ | 30.8               | 61.9               | 124.6              | 62.6                | -31.8               | -104.6              | -72.7                |
| BC-11    | $5.54 \cdot 10^{-6}$ | 30.0               | 54.7               | 150.0              | 95.5                | -24.7               | -131.3              | -83.9                |
| SA1-1    | $1.35 \cdot 10^{-6}$ | 33.5               | 74.0               | 134.1              | 60.1                | -40.5               | -81.2               | -40.7                |
| SA1-2    | $8.33 \cdot 10^{-7}$ | 34.7               | 61.7               | 141.1              | 79.4                | -27.0               | -104.1              | -77.1                |
| SA1-3    | $9.43 \cdot 10^{-8}$ | 40.1               | 85.8               | 167.5              | 81.7                | -45.7               | -144.8              | -99.1                |
| SA1-4    | $4.19 \cdot 10^{-7}$ | 36.4               | 75.7               | 155.4              | 79.7                | -39.3               | -115.9              | -76.6                |
| SA1-5    | $5.13 \cdot 10^{-7}$ | 35.9               | 68.5               | 130.0              | 61.5                | -32.6               | -84.2               | -51.6                |
| SA1-6    | $6.81 \cdot 10^{-7}$ | 35.2               | 76.4               | 144.6              | 68.2                | -41.2               | -97.8               | -56.6                |
| SA1-7    | $1.52 \cdot 10^{-6}$ | 33.2               | 73.5               | 147.2              | 73.7                | -40.3               | -101.0              | -60.7                |
| SA1-8    | $5.54 \cdot 10^{-6}$ | 30.0               | 88.0               | 168.3              | 80.3                | -58.0               | -121.3              | -63.3                |
| SA1-9    | $1.35 \cdot 10^{-5}$ | 27.8               | 78.0               | 131.4              | 53.4                | -50.2               | -81.2               | -31.0                |
| SA1-10   | $4.19 \cdot 10^{-7}$ | 36.4               | 74.2               | 143.6              | 69.4                | -37.8               | -91.1               | -53.3                |
| SA1-11   | $1.10 \cdot 10^{-6}$ | 34.0               | 72.4               | 124.0              | 51.6                | -38.4               | -79.9               | -41.5                |
| SA2-1    | $7.35 \cdot 10^{-6}$ | 29.3               | 53.4               | 111.5              | 58.1                | -24.1               | -69.0               | -44.9                |
| SA2-2    | $7.38 \cdot 10^{-7}$ | 35.0               | 50.4               | 114.0              | 63.6                | -15.4               | -55.9               | -40.5                |
| SA2-3    | $1.10 \cdot 10^{-6}$ | 34.0               | 54.1               | 124.9              | 70.8                | -20.1               | -75.1               | -55.0                |
| SA2-4    | $1.52 \cdot 10^{-6}$ | 33.2               | 49.9               | 98.6               | 48.7                | -16.7               | -52.0               | -35.3                |
| SA2-5    | $1.24 \cdot 10^{-5}$ | 28.0               | 67.7               | 132.5              | 64.7                | -39.7               | -80.4               | -40.7                |

**Table 1SI (Continued)**

| Compound | $X_2^{298}$          | $\Delta G_{sol}^0$ | $\Delta G_{sub}^0$ | $\Delta H_{sub}^0$ | $T\Delta S_{sub}^0$ | $\Delta G_{solv}^0$ | $\Delta H_{solv}^0$ | $T\Delta S_{solv}^0$ |
|----------|----------------------|--------------------|--------------------|--------------------|---------------------|---------------------|---------------------|----------------------|
| F-1      | $1.29 \cdot 10^{-5}$ | 27.9               | 58.9               | 126.0              | 68.0                | -31.0               | -97.0               | -66.0                |
| F-2      | $1.10 \cdot 10^{-4}$ | 22.6               | 54.3               | 121.2              | 66.9                | -31.7               | -89.1               | -57.4                |
| F-3      | $2.09 \cdot 10^{-4}$ | 21.0               | 61.3               | 130.2              | 68.9                | -40.3               | -90.7               | -50.4                |
| F-4      | $4.72 \cdot 10^{-6}$ | 30.4               | 59.2               | 136.2              | 77.0                | -28.8               | -87.7               | -58.9                |
| F-5      | $8.30 \cdot 10^{-6}$ | 29.0               | 53.9               | 128.4              | 74.8                | -24.9               | -99.4               | -74.5                |
| F-6      | $1.20 \cdot 10^{-6}$ | 33.8               | 49.3               | 115.6              | 66.4                | -15.5               | -105.4              | -89.9                |
| T-1      | $8.97 \cdot 10^{-5}$ | 23.1               | 58.3               | 123.8              | 65.5                | -35.2               | -101.5              | -66.2                |
| T-2      | $4.00 \cdot 10^{-5}$ | 25.1               | 62.5               | 142.0              | 79.5                | -37.4               | -124.9              | -87.5                |
| T-3      | $1.79 \cdot 10^{-5}$ | 27.1               | 60.2               | 152.8              | 92.6                | -33.1               | -131.4              | -98.3                |
| T-4      | $3.03 \cdot 10^{-6}$ | 31.5               | 58.6               | 160.0              | 101.4               | -27.1               | -133.7              | -106.6               |
| T-5      | $6.24 \cdot 10^{-5}$ | 24.0               | 59.1               | 124.8              | 65.7                | -35.1               | -122.1              | -86.9                |
| T-6      | $1.46 \cdot 10^{-5}$ | 27.6               | 71.9               | 138.0              | 66.1                | -44.3               | -87.8               | -43.5                |
| T-7      | $5.53 \cdot 10^{-5}$ | 24.3               | 60.8               | 129.0              | 68.2                | -36.5               | -95.3               | -58.8                |
| T-8      | $9.40 \cdot 10^{-7}$ | 34.4               | 62.6               | 120.7              | 58.1                | -28.0               | -93.6               | -65.6                |
| T-9      | $8.30 \cdot 10^{-6}$ | 29.0               | 64.5               | 132.6              | 68.1                | -35.5               | -113.9              | -78.4                |
| T-10     | $2.02 \cdot 10^{-5}$ | 26.8               | 60.2               | 137.3              | 77.1                | -33.4               | -114.7              | -81.3                |
| T-11     | $1.02 \cdot 10^{-5}$ | 28.5               | 60.4               | 115.6              | 55.2                | -31.9               | -105.0              | -73.1                |
| T-12     | $7.97 \cdot 10^{-6}$ | 29.1               | 57.6               | 101.9              | 44.3                | -28.5               | -83.3               | -54.8                |
